# Supplementary material
Source: publisher site journal article supplement (https://www.dovepress.com/article/441453)
Supplement: Supplementary file 1 [file get_supplementary_file.php]

Supporting Information

**Supplementary Figure S1.** Characterization of HUVECs. （A）The morphology of endothelial cells. Scale bar=200 μm. (B) Flow cytometry analysis of marker of endothelial cells, CD31.

**
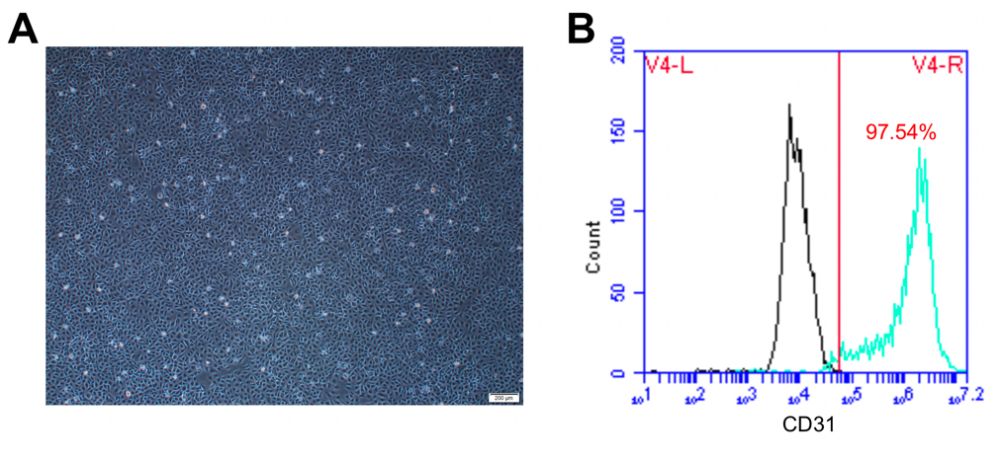
**

**Supplementary Table S1.** Primers for qRT-PCR.

| **Target cDNA** | **Primer sequence (5’-3’)** |
| --- | --- |
| human-GAPDH | CTTTGGTATCGTGGAAGGACTC  GTAGAGGCAGGGATGATGTTCT |
| human-CD31 | TCGTGGTCAACATAACAGAACT  TTGAGTCTGTGACACAATCGTA |
| human-VEGF | AGGGAAGAGGAGGAGATGAG  GCTGGGTTTGTCGGTGTT |
| human-angiogenin | ACCCTCACAGAGAAAACCTAAG |
| GACGACGGAAAATTGACTGATC |
| human-Col 1 | AACATGGAGACTGGTGAGACCT  CGCCATACTCGAACTGGAATC |
| human-Col 3 | CTTCTCTCCAGCCGAGCTTC  TGTGTTTCGTGCAACCATCC |
